# Supplementary material
Source: Research Square preprint supplement (doi:10.21203/rs.3.rs-8957590/v1)
Supplement: Supplementary file 2 [file e1707b833e0b14d8aa1a9d2e.docx]

**Uncropped raw immunoblot images**

**Fig.1a, p-p38**

**
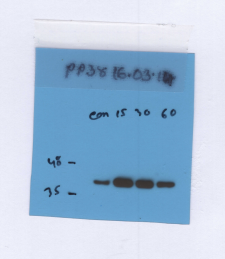
**

**Fig.1a, t-p38**

**
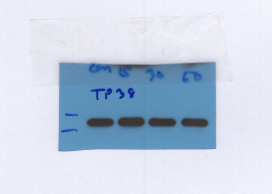
**

**Fig.1a, p-ERK1/2**

**
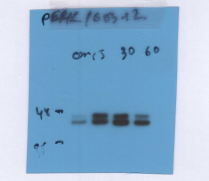
**

**Fig.1a, t-ERK1/2**

**
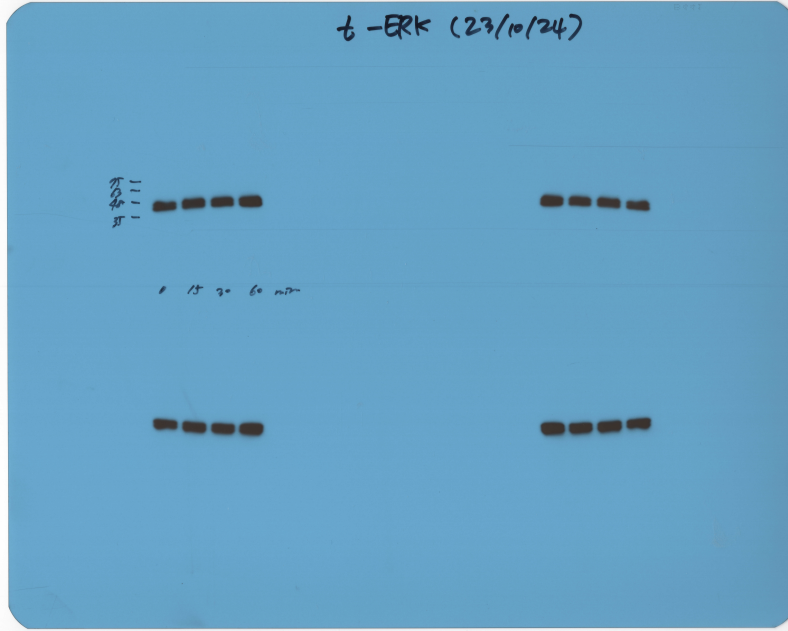
**

**Fig.1a, p-CREB**

**
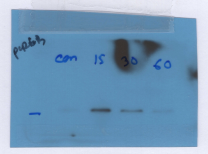
**

**Fig.1a, t-CREB**

**
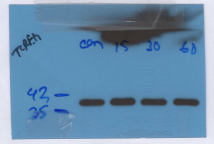
**

**Fig.1a, p-AKT**

**
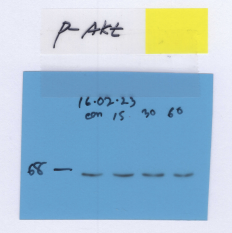
**

**Fig.1a, t-AKT**

**
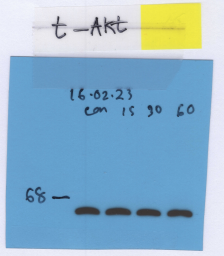
**

**Fig.1a, p-JNK**

**
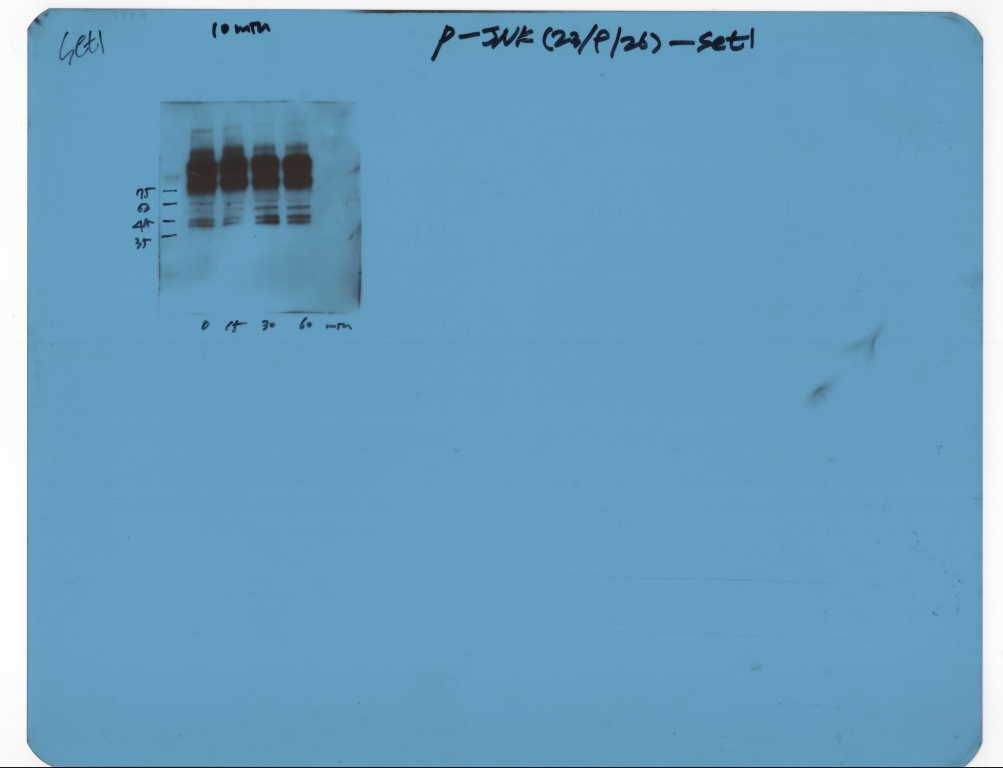
**

**Fig.1a, t-JNK**

**
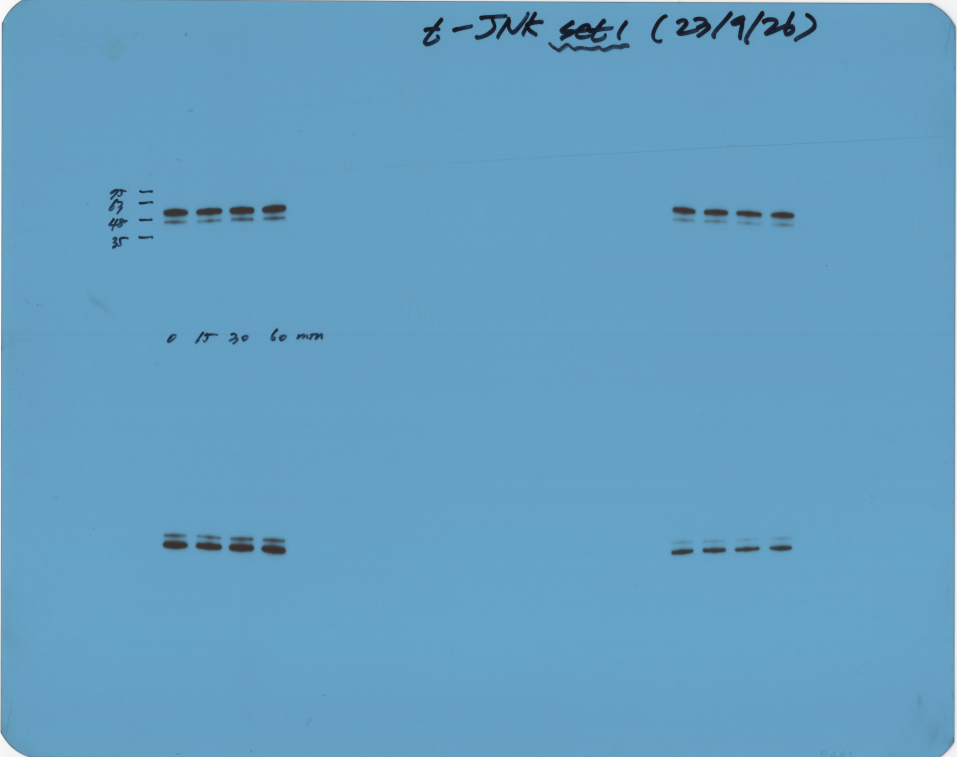
**

**Fig.1a, IκB-α**

**
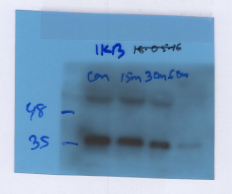
**

**Fig.1a, β-actin**

**
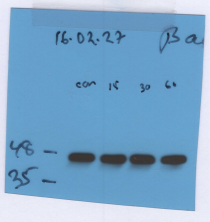
**

**Fig.1e, p-p38**

**
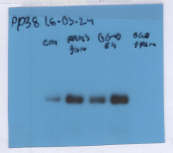
**

**Fig.1e, t-p38**

**
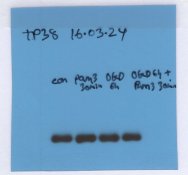
**

**Fig.1e, p-ERK1/2**

**
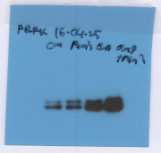
**

**Fig.1e, t-ERK1/2**

**
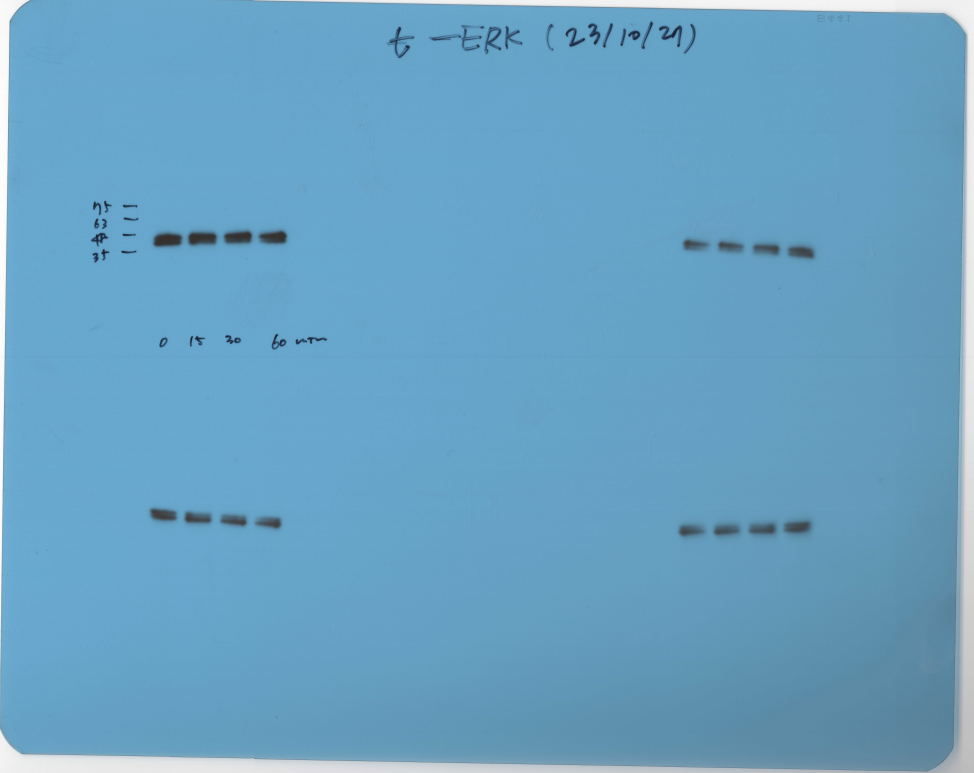
**

**Fig.1e, p-CREB**

**
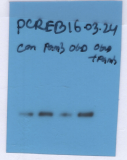
**

**Fig.1e, t-CREB**

**
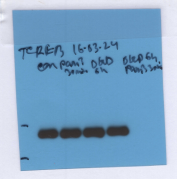
**

**Fig.1e, IκB-α**

**
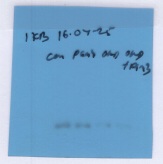
**

**Fig.1e, β-actin**

**
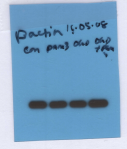
**

**Fig.S1a, p38**

**
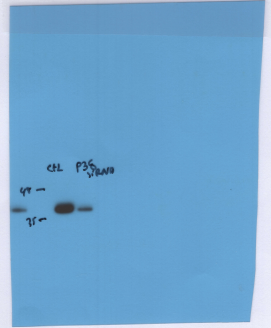
**

**Fig.S1b, p65**

**
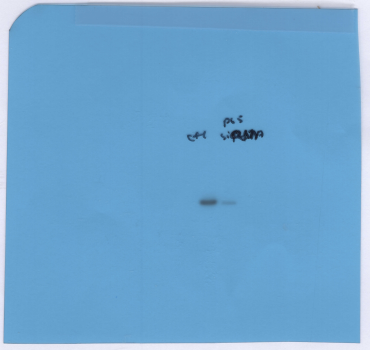
**

**Fig.S1c, ERK1/2**

**
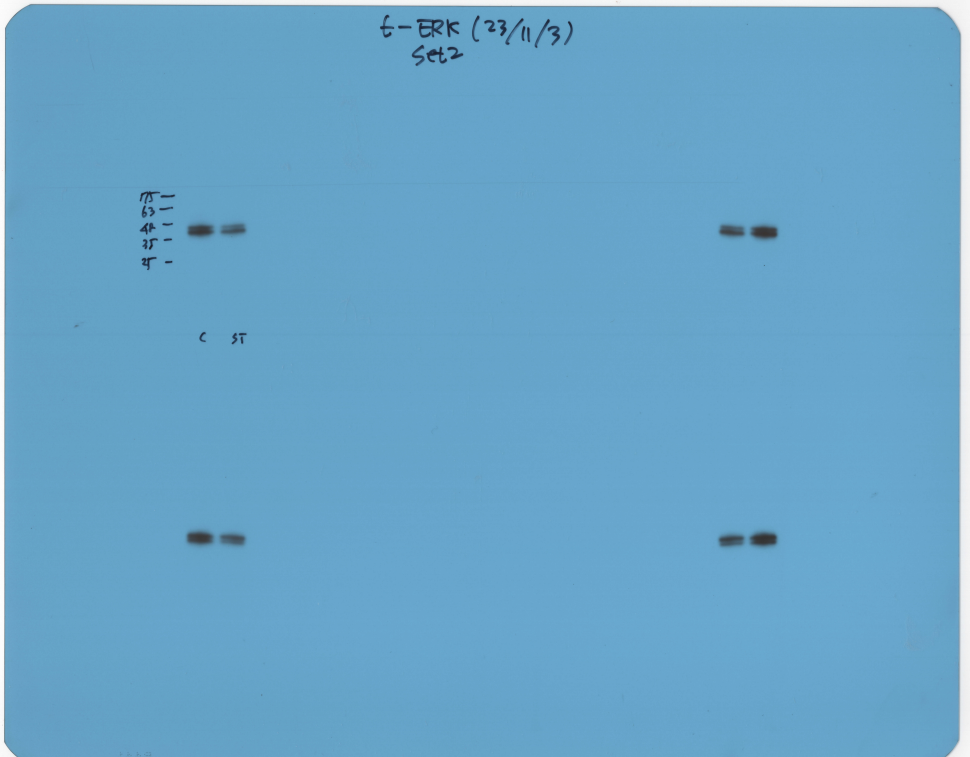
**

**Fig.S1d, CREB**

**
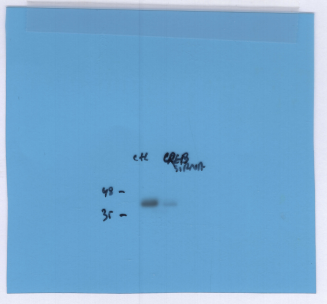
**

**Fig.S1a&d, ɑ-tubulin**

**
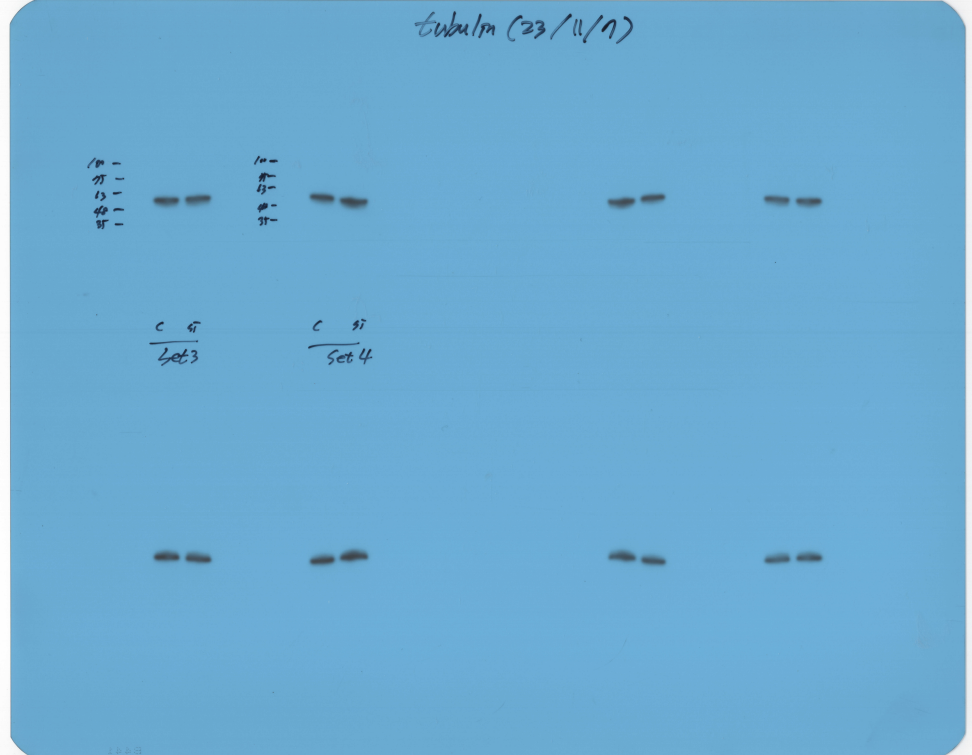
**

**Fig.S1b&c, ɑ-tubulin**

**
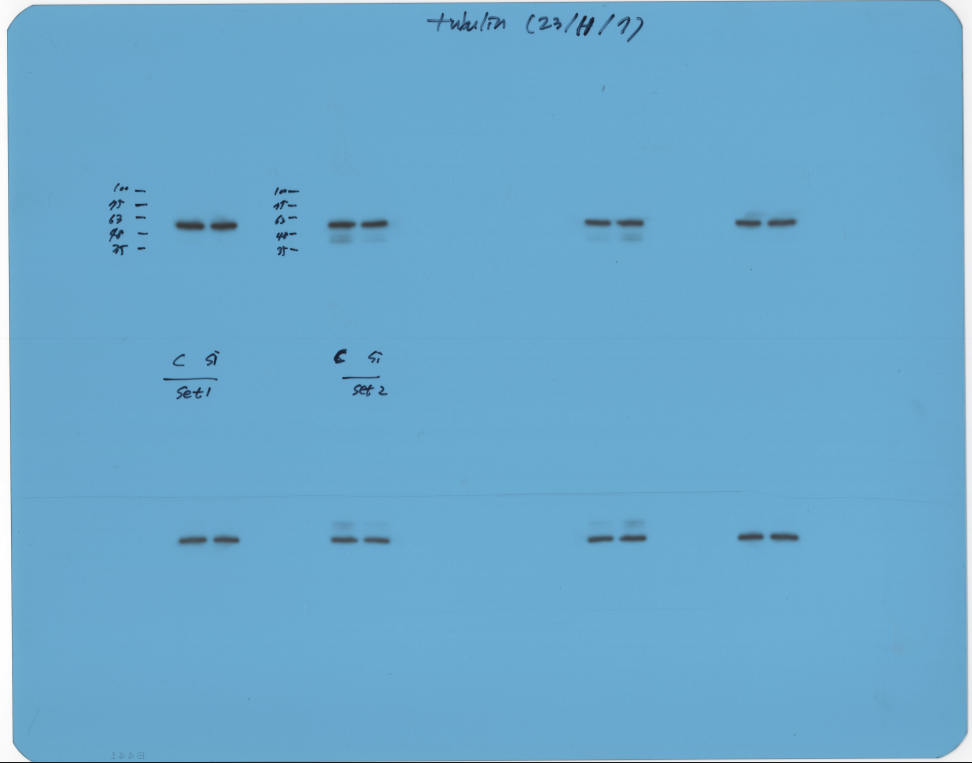
**

**Fig.3b, FLAG**

**
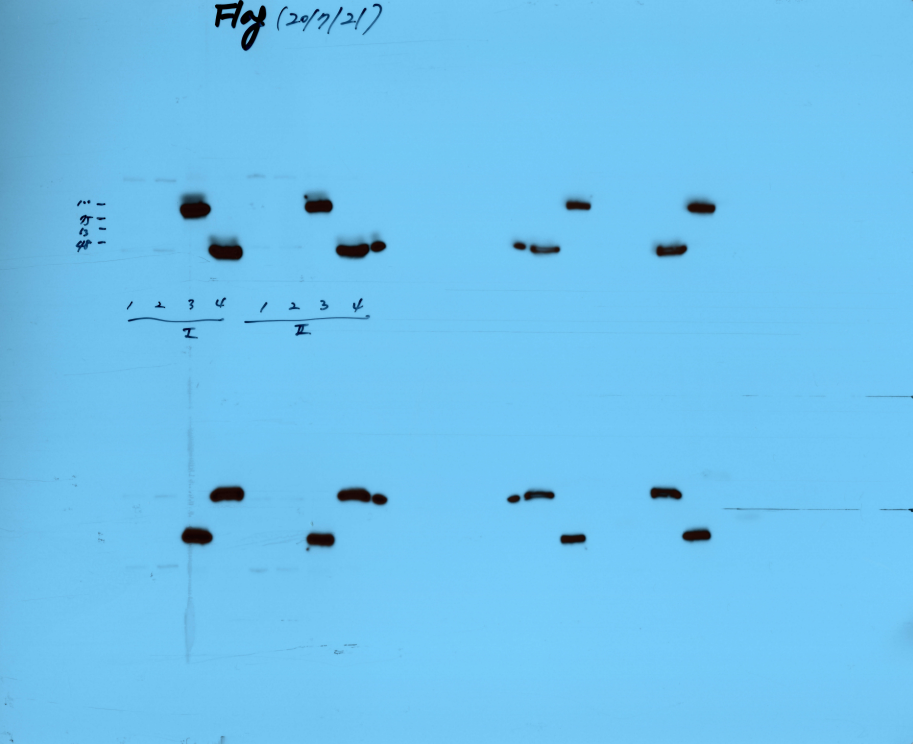
**

**Fig.3b, p-p38**

**
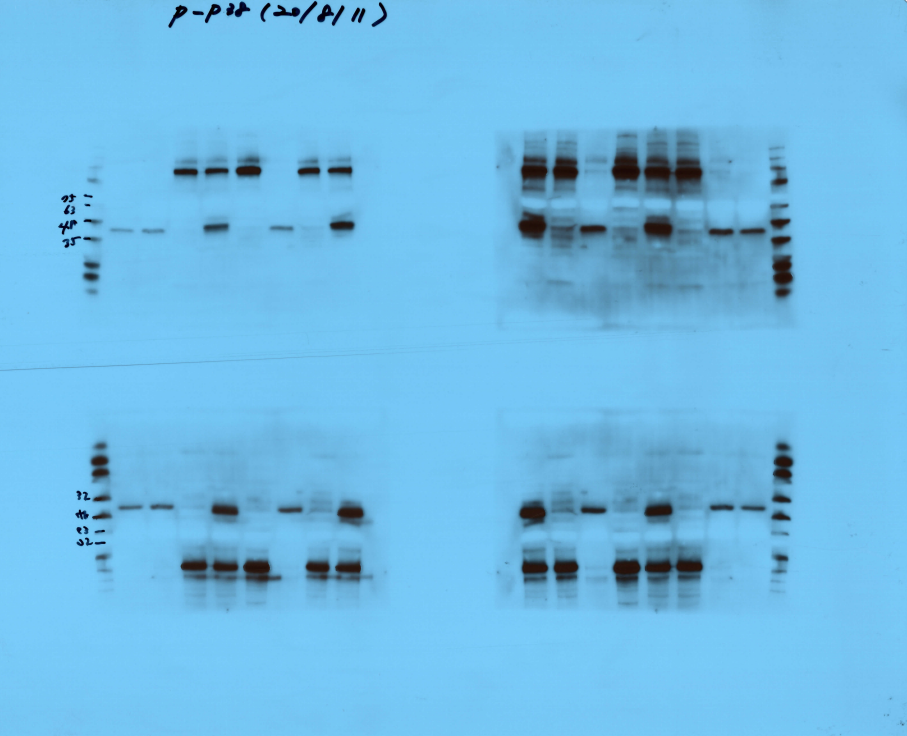
**

**Fig.3b, t-p38**

**
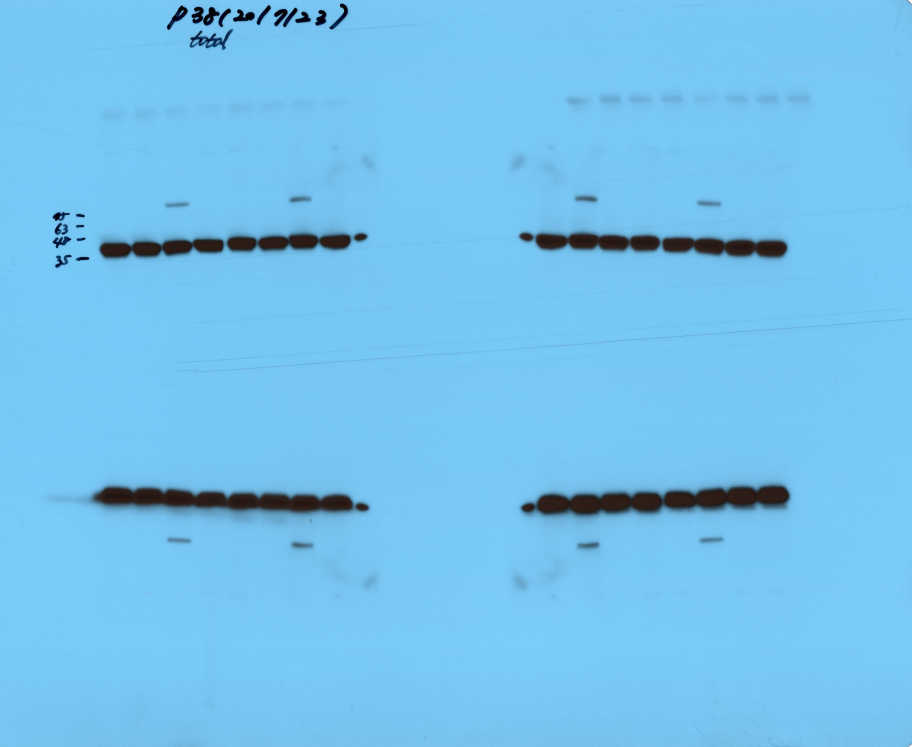
**

**Fig.3b, p-p65**

**
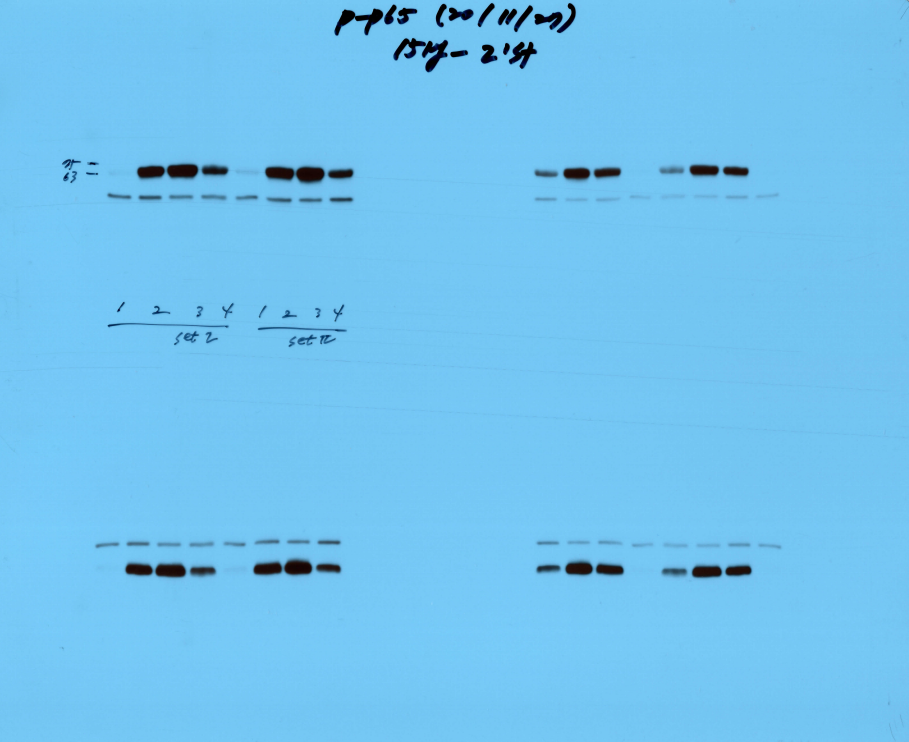
**

**Fig.3b, t-p65**

**
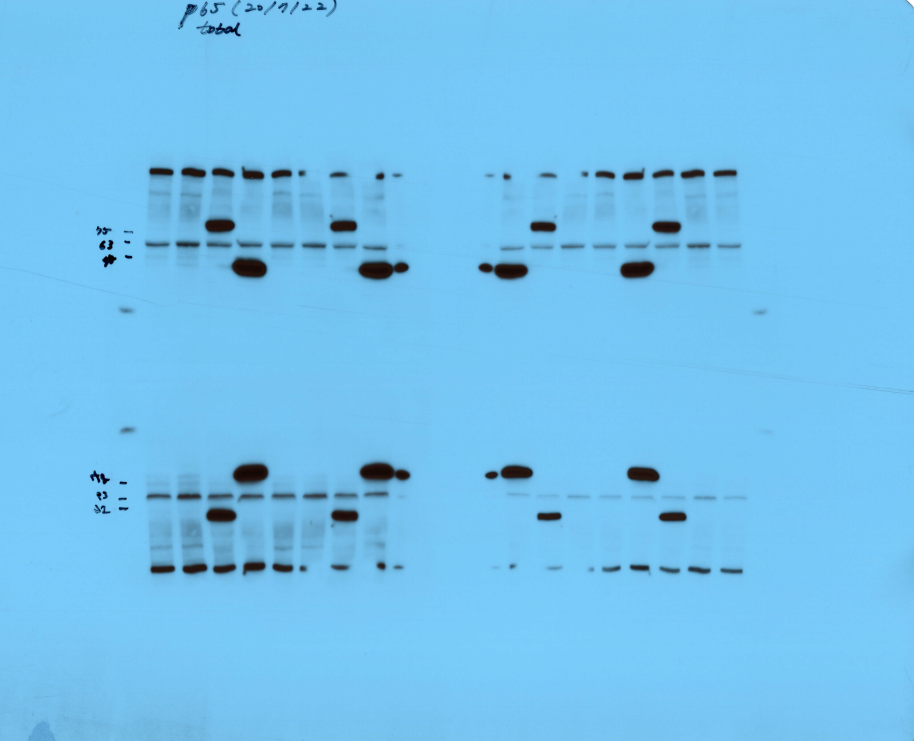
**

**Fig.3b, cIAP2**

**
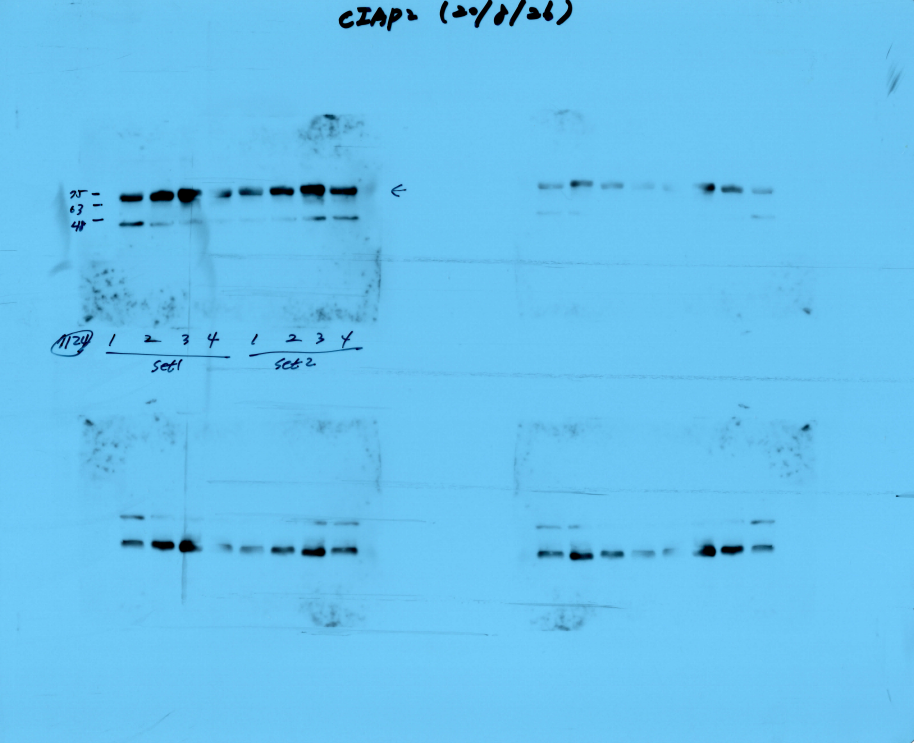
**

**Fig.3b, Bcl-2**

**
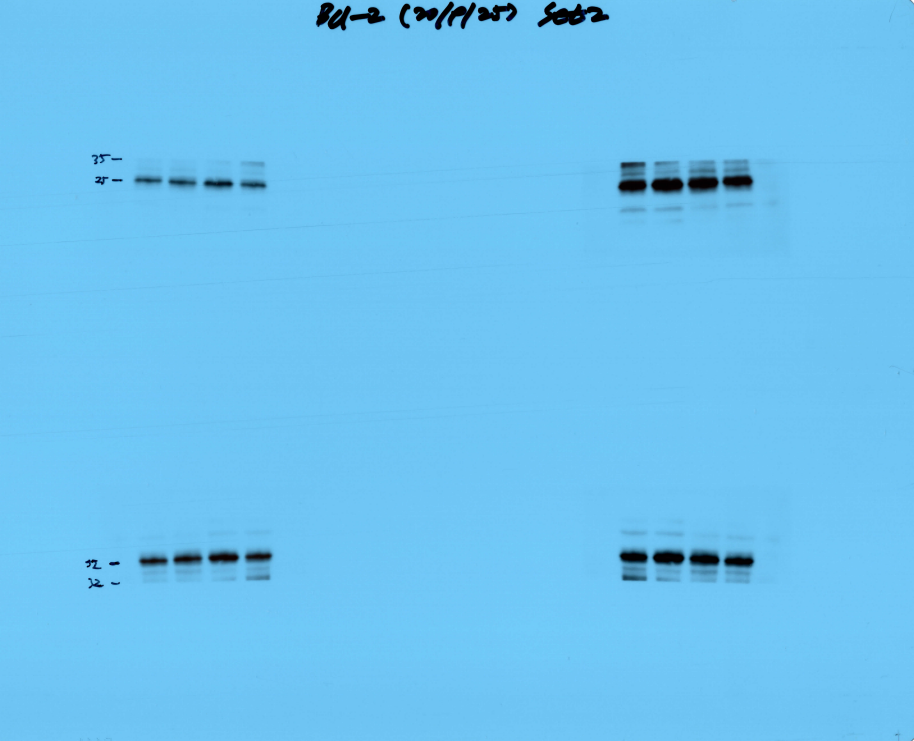
**

**Fig.3b, ɑ-tubulin**

**
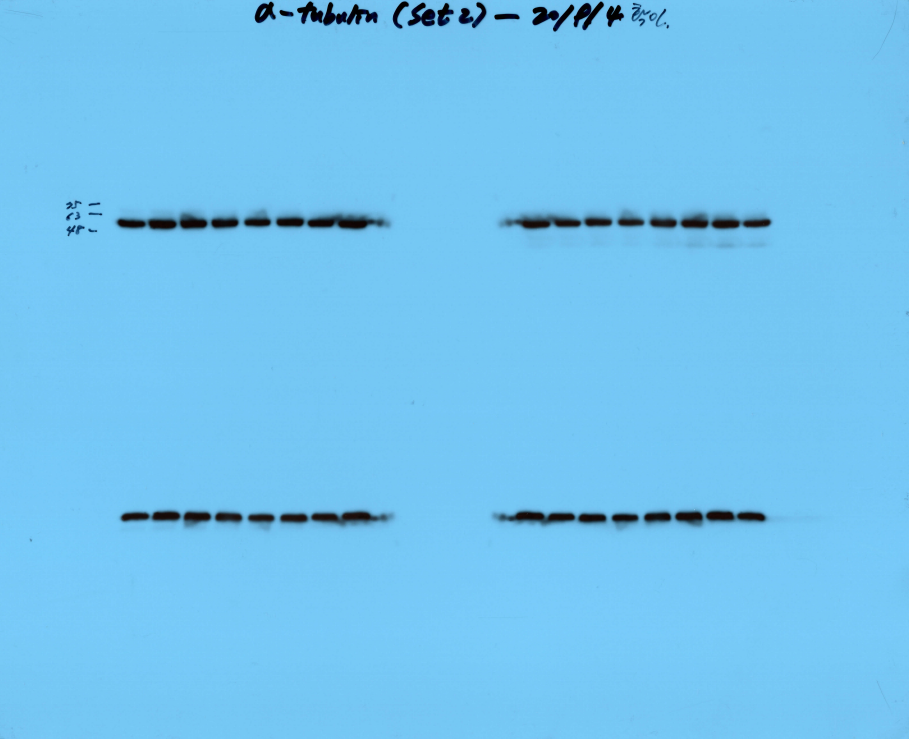
**

**Fig.3f, FLAG**

**
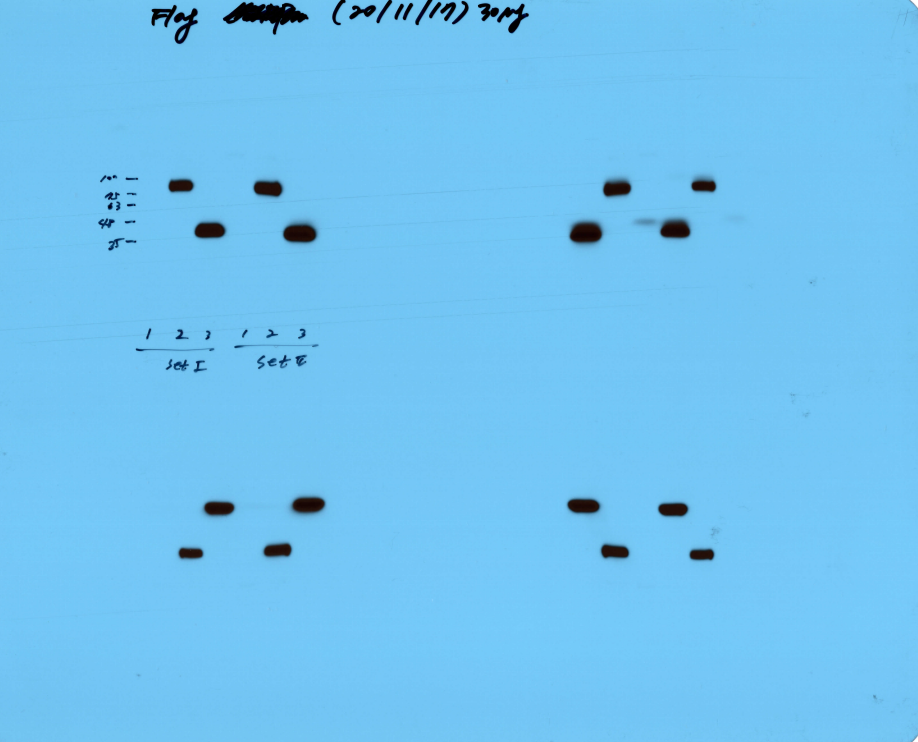
**

**Fig.3f, p-p38**

**
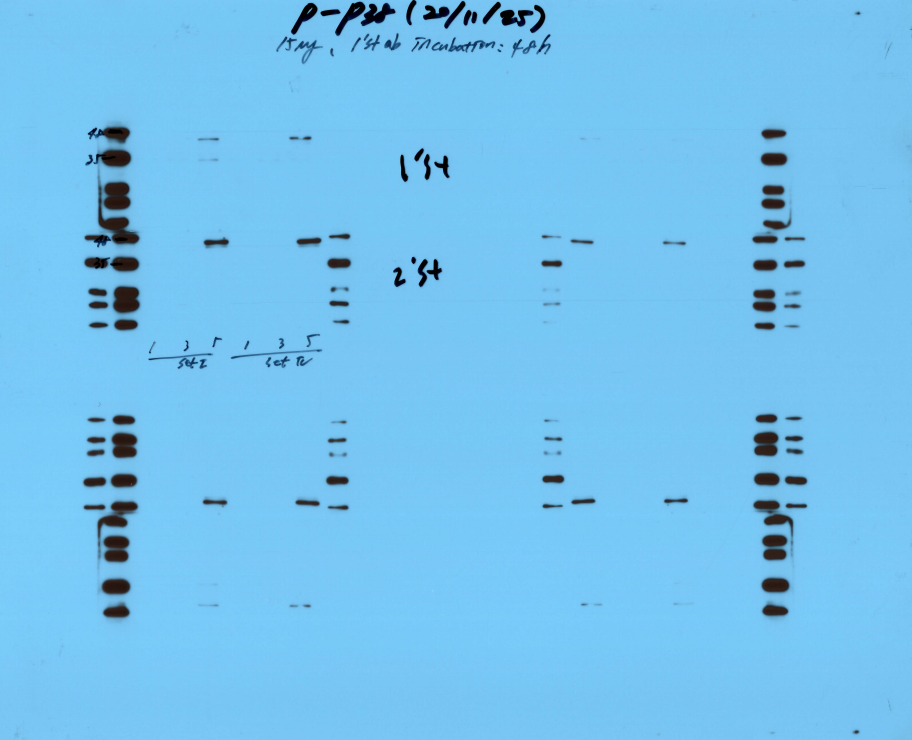
**

**Fig.3f, t-p38**

**
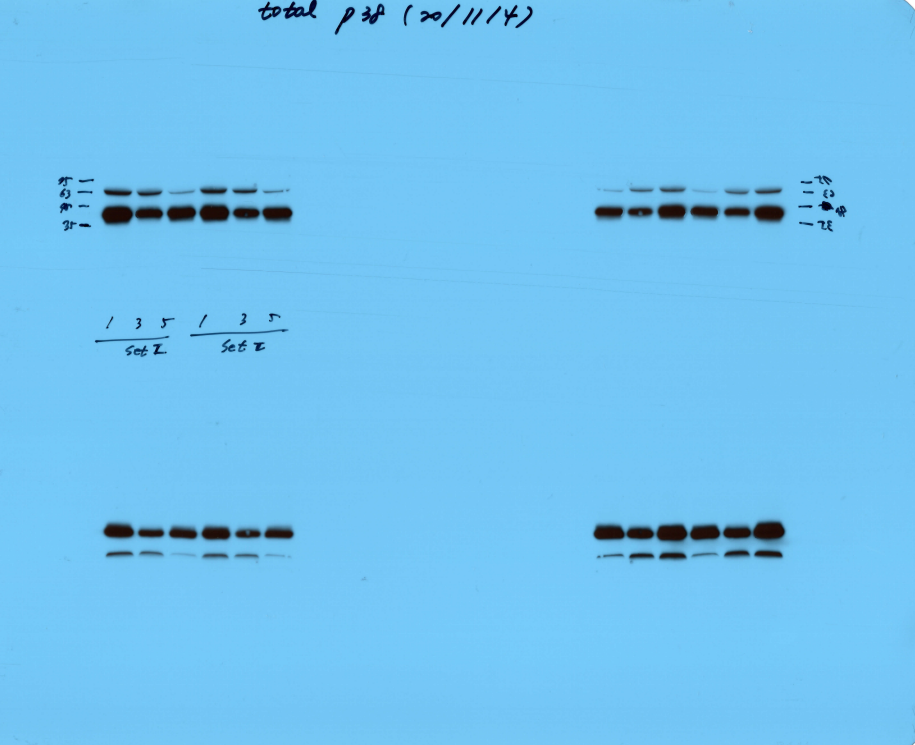
**

**Fig.3f, p-p65**

**
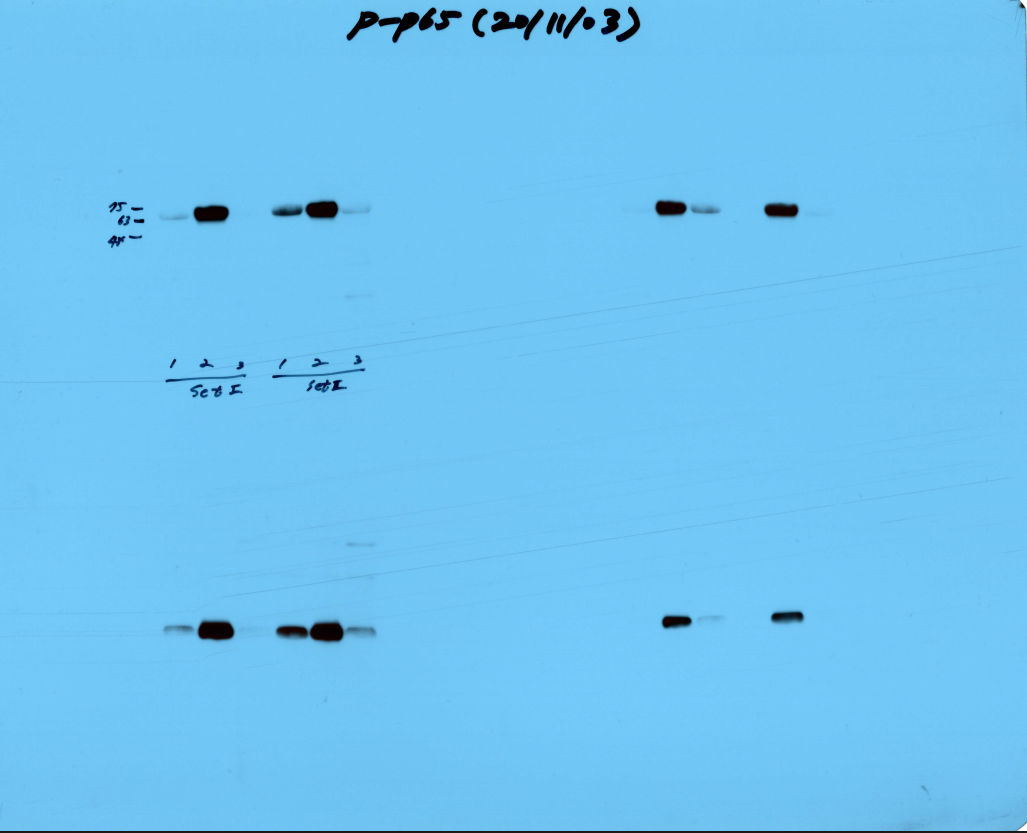
**

**Fig.3f, t-p65**

**
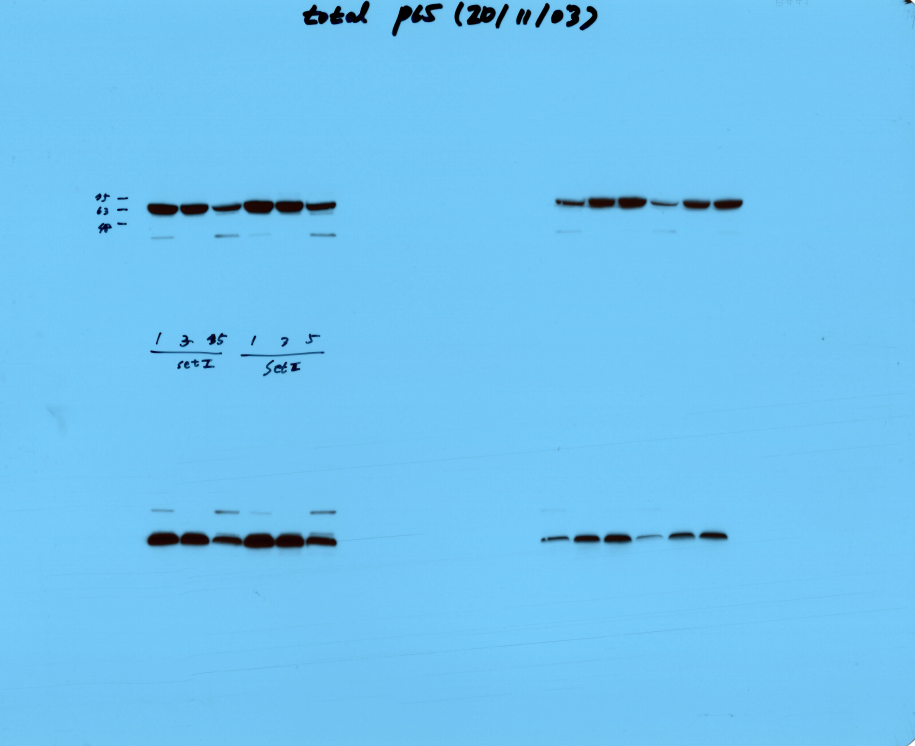
**

**Fig.3f, cIAP2**

**
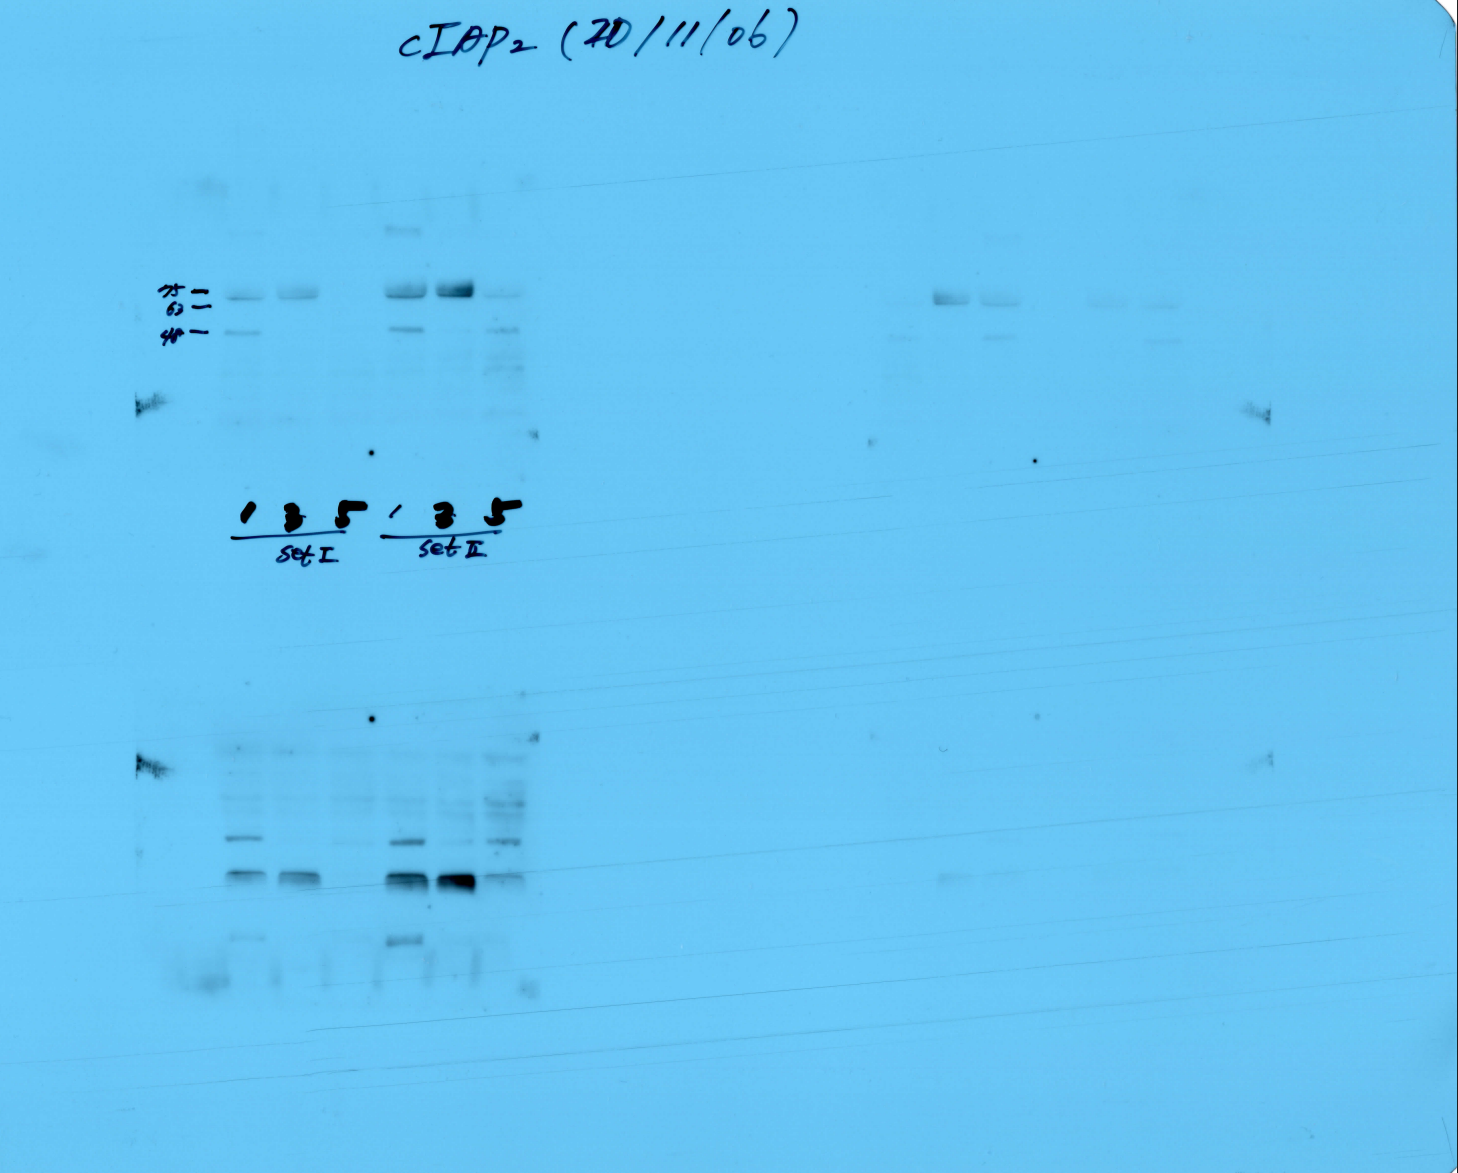
**

**Fig.3f, ɑ-tubulin**

**
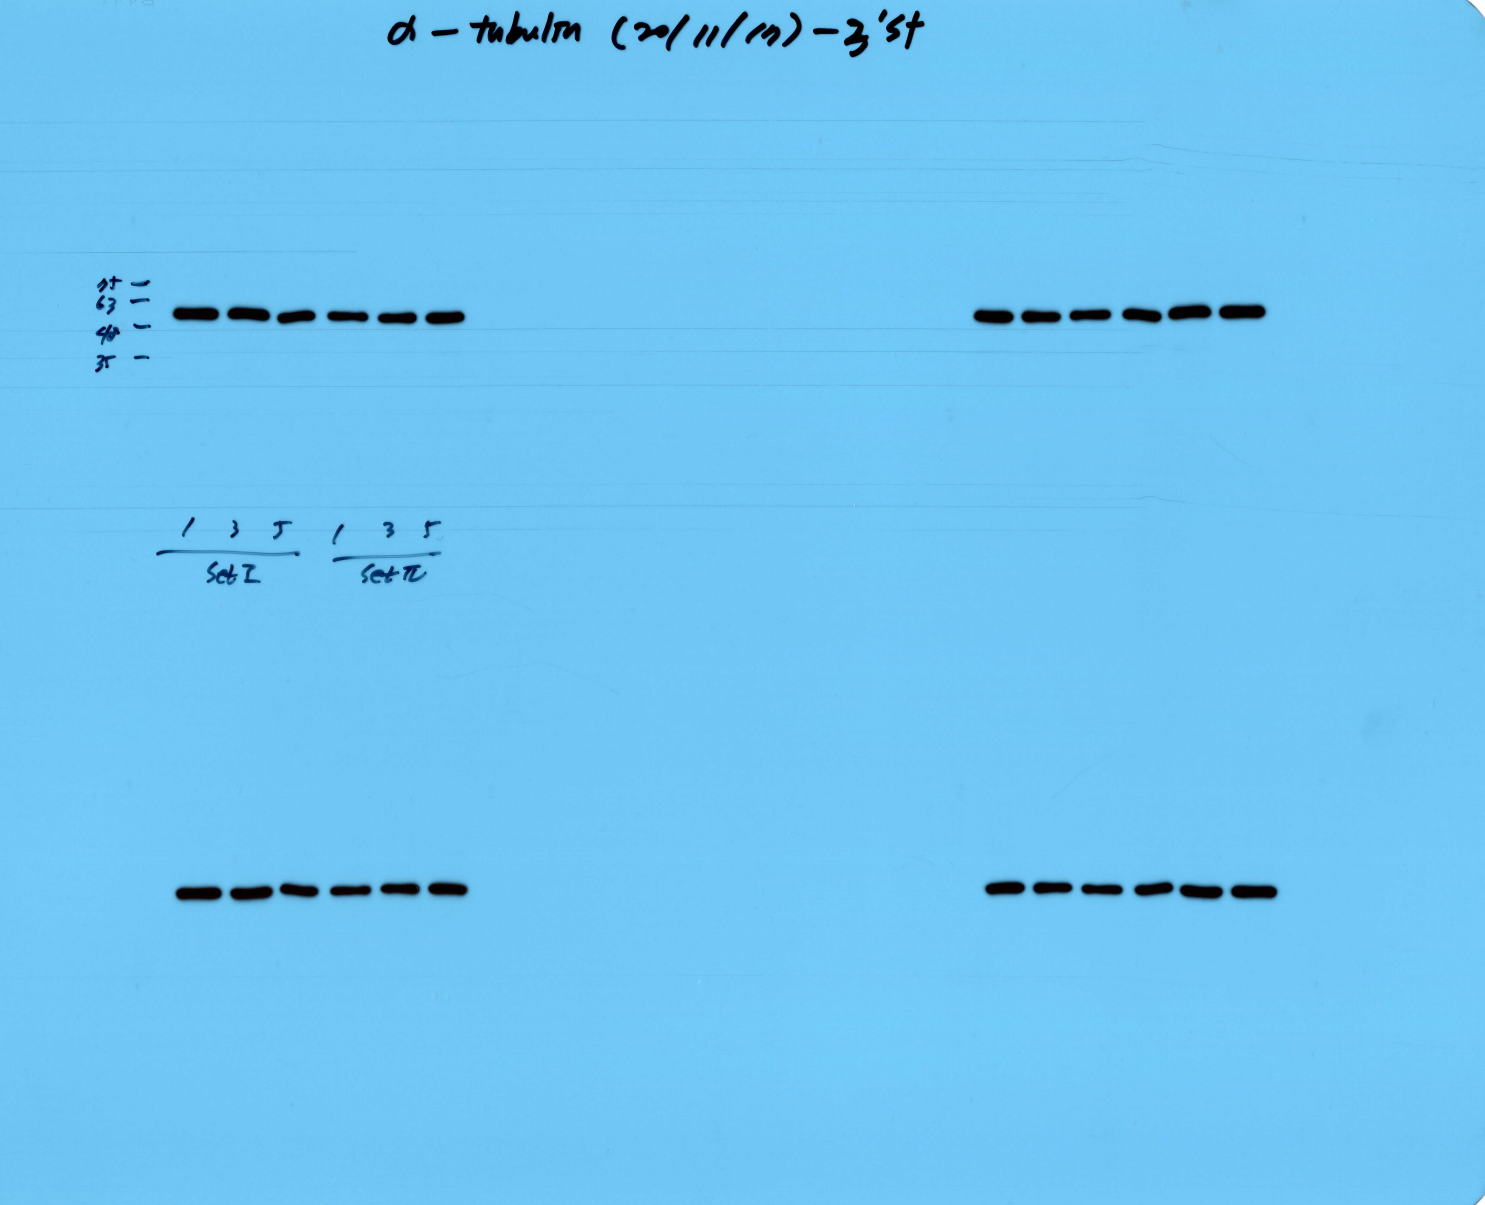
**

**Fig.4b, FLAG**

**
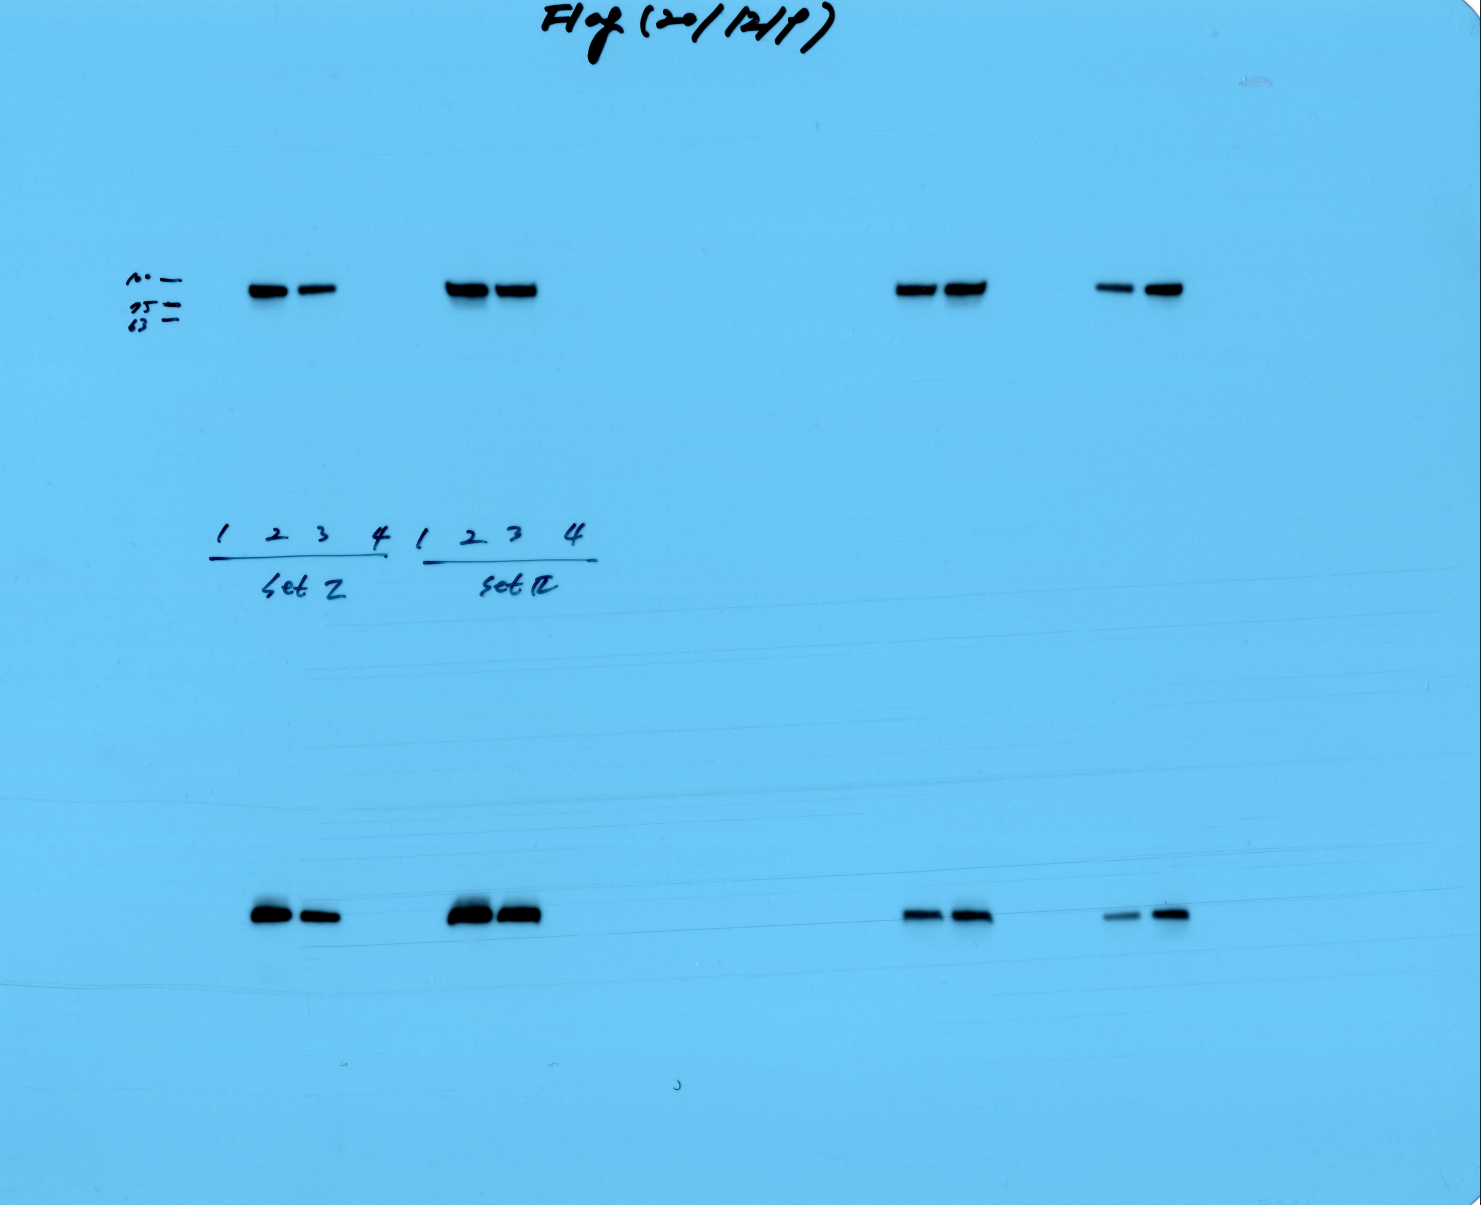
**

**Fig.4b, p-p65**

**
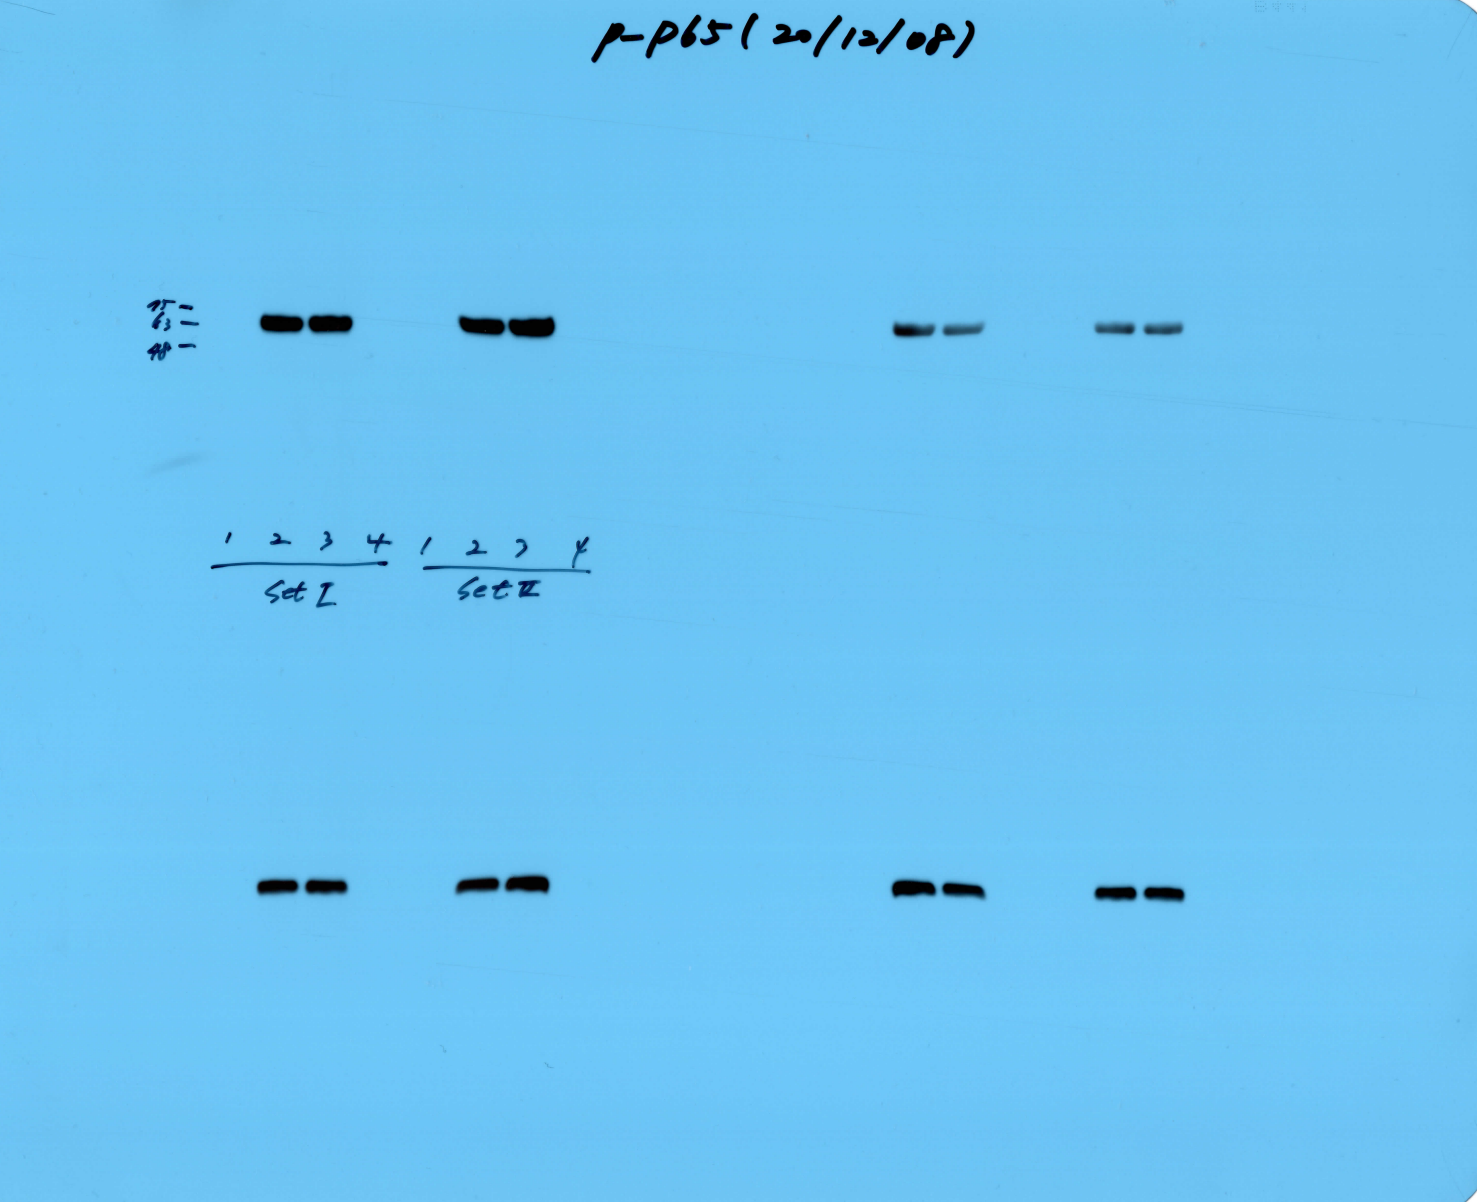
**

**Fig.4b, t-p65**

**
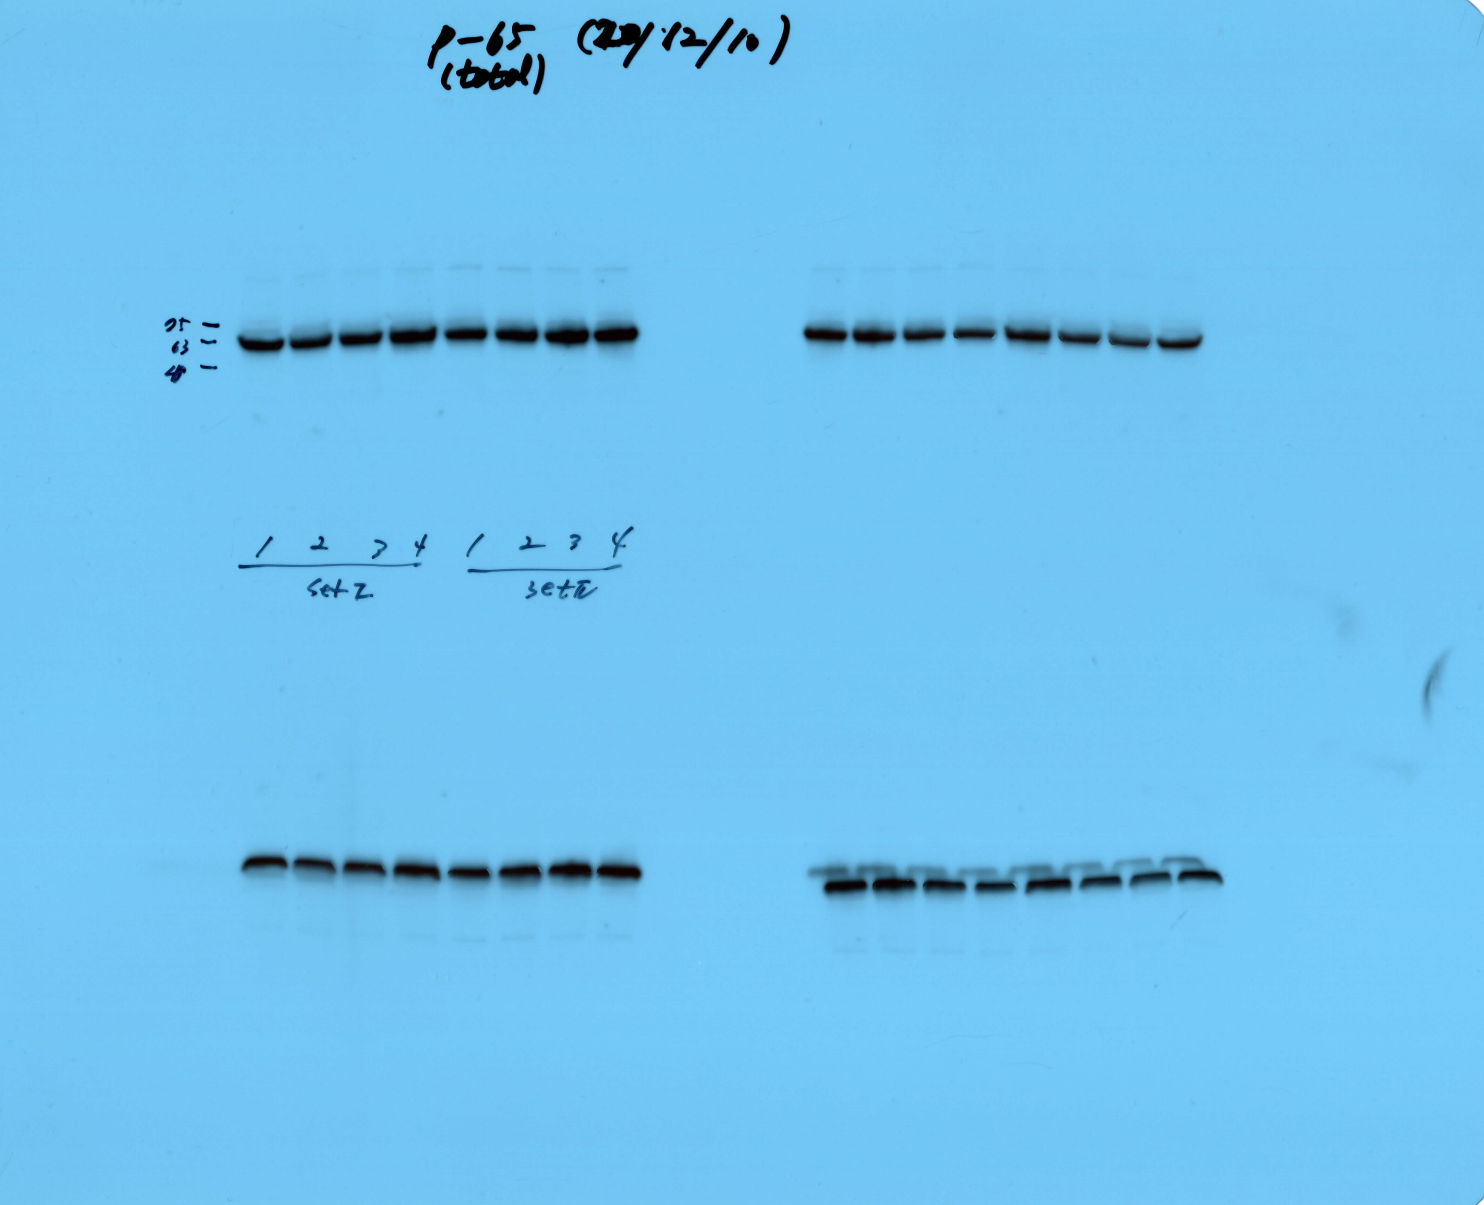
**

**Fig.4b, cIAP2**

**
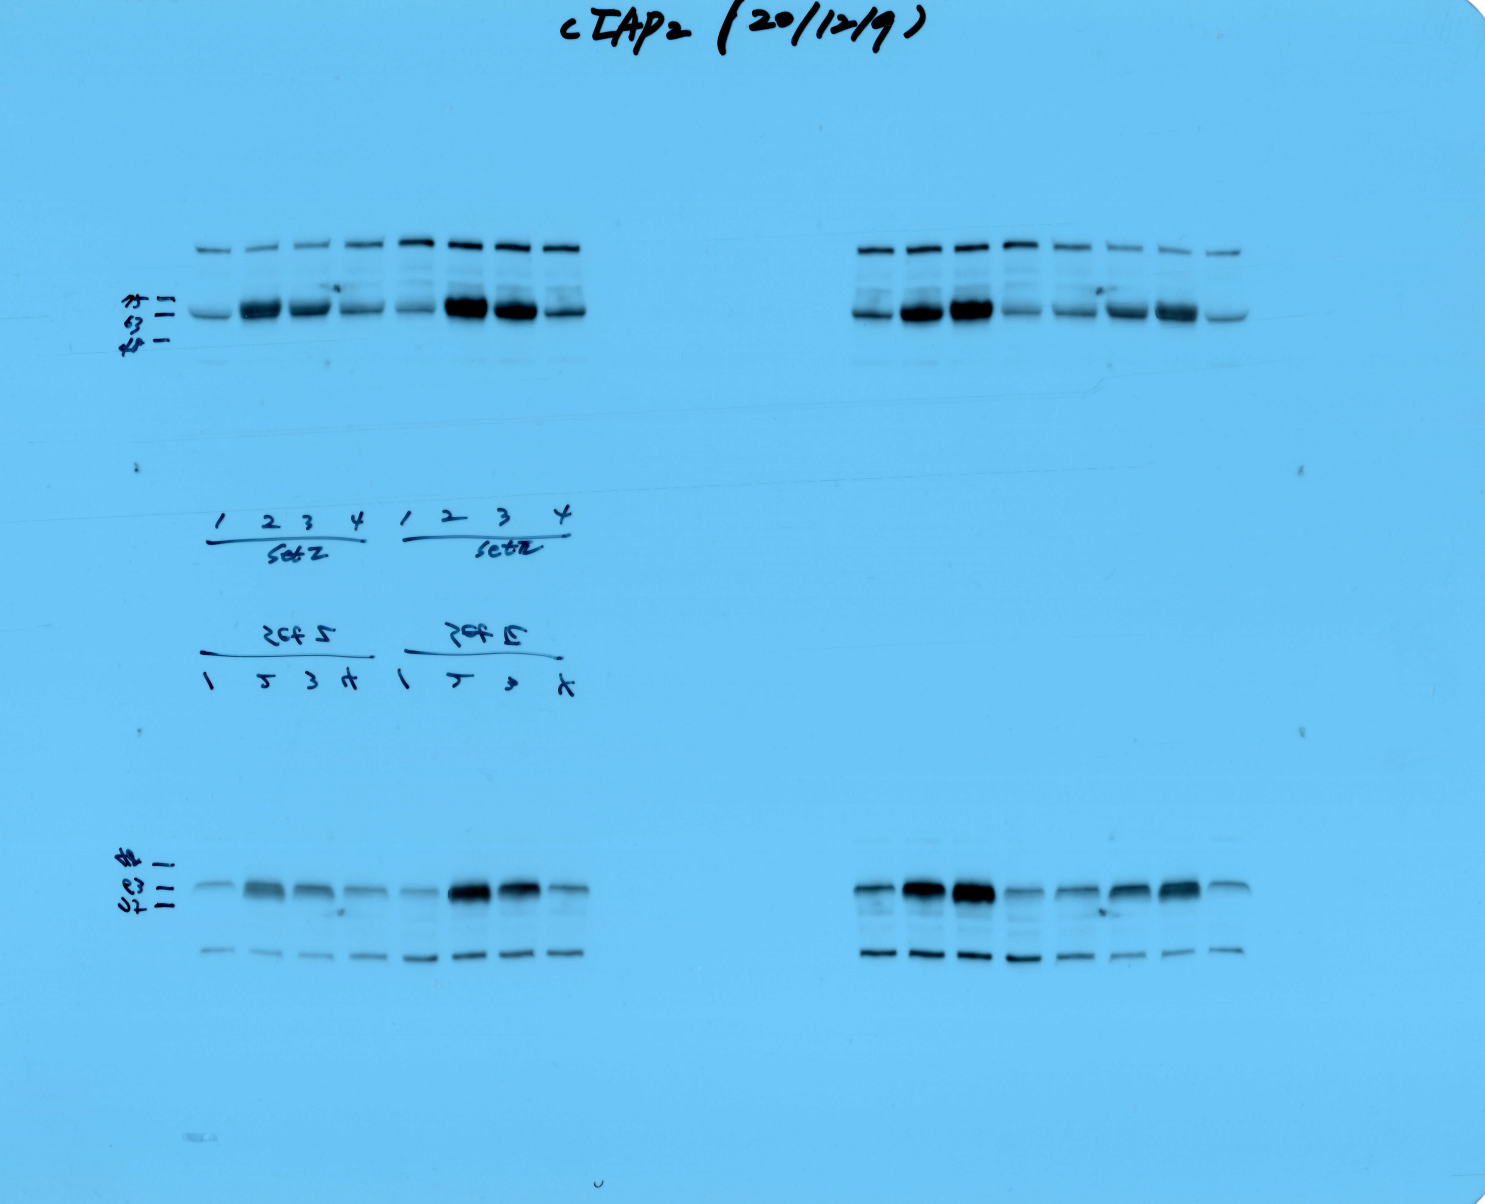
**

**Fig.4b, ɑ-tubulin**

**
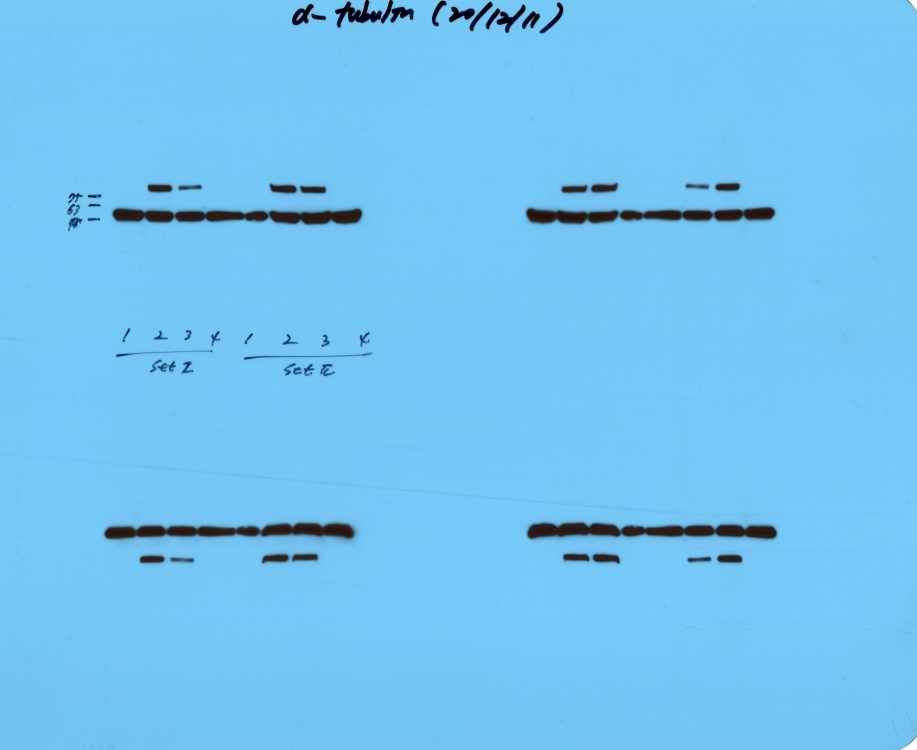
**

**Fig.4e, Myc**

**
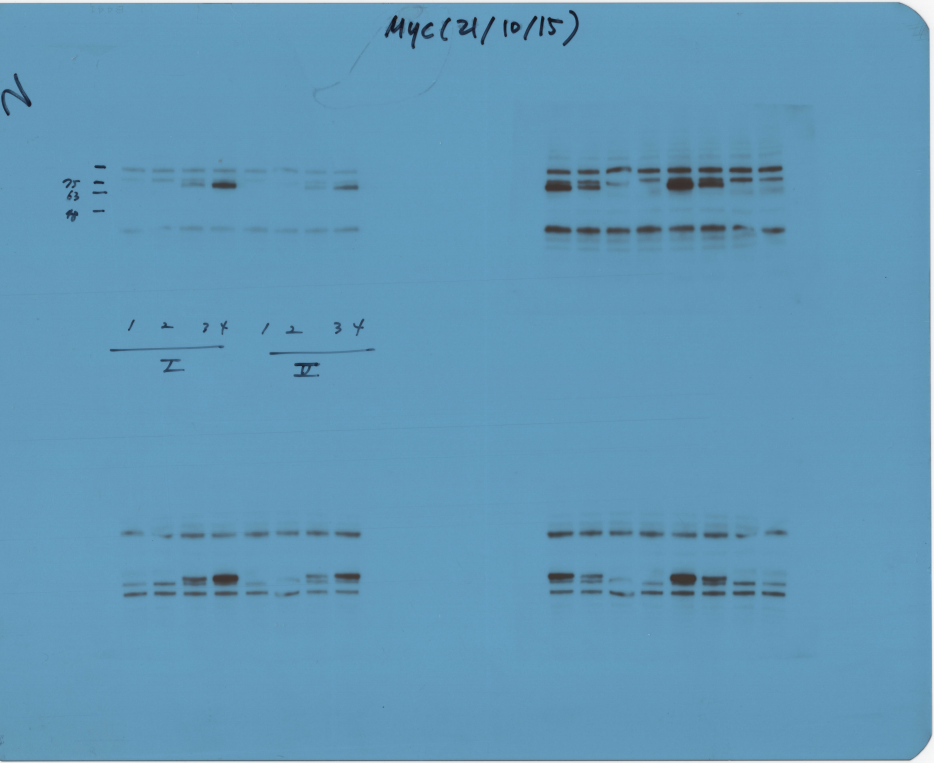
**

**Fig.4e, p-p65**

**
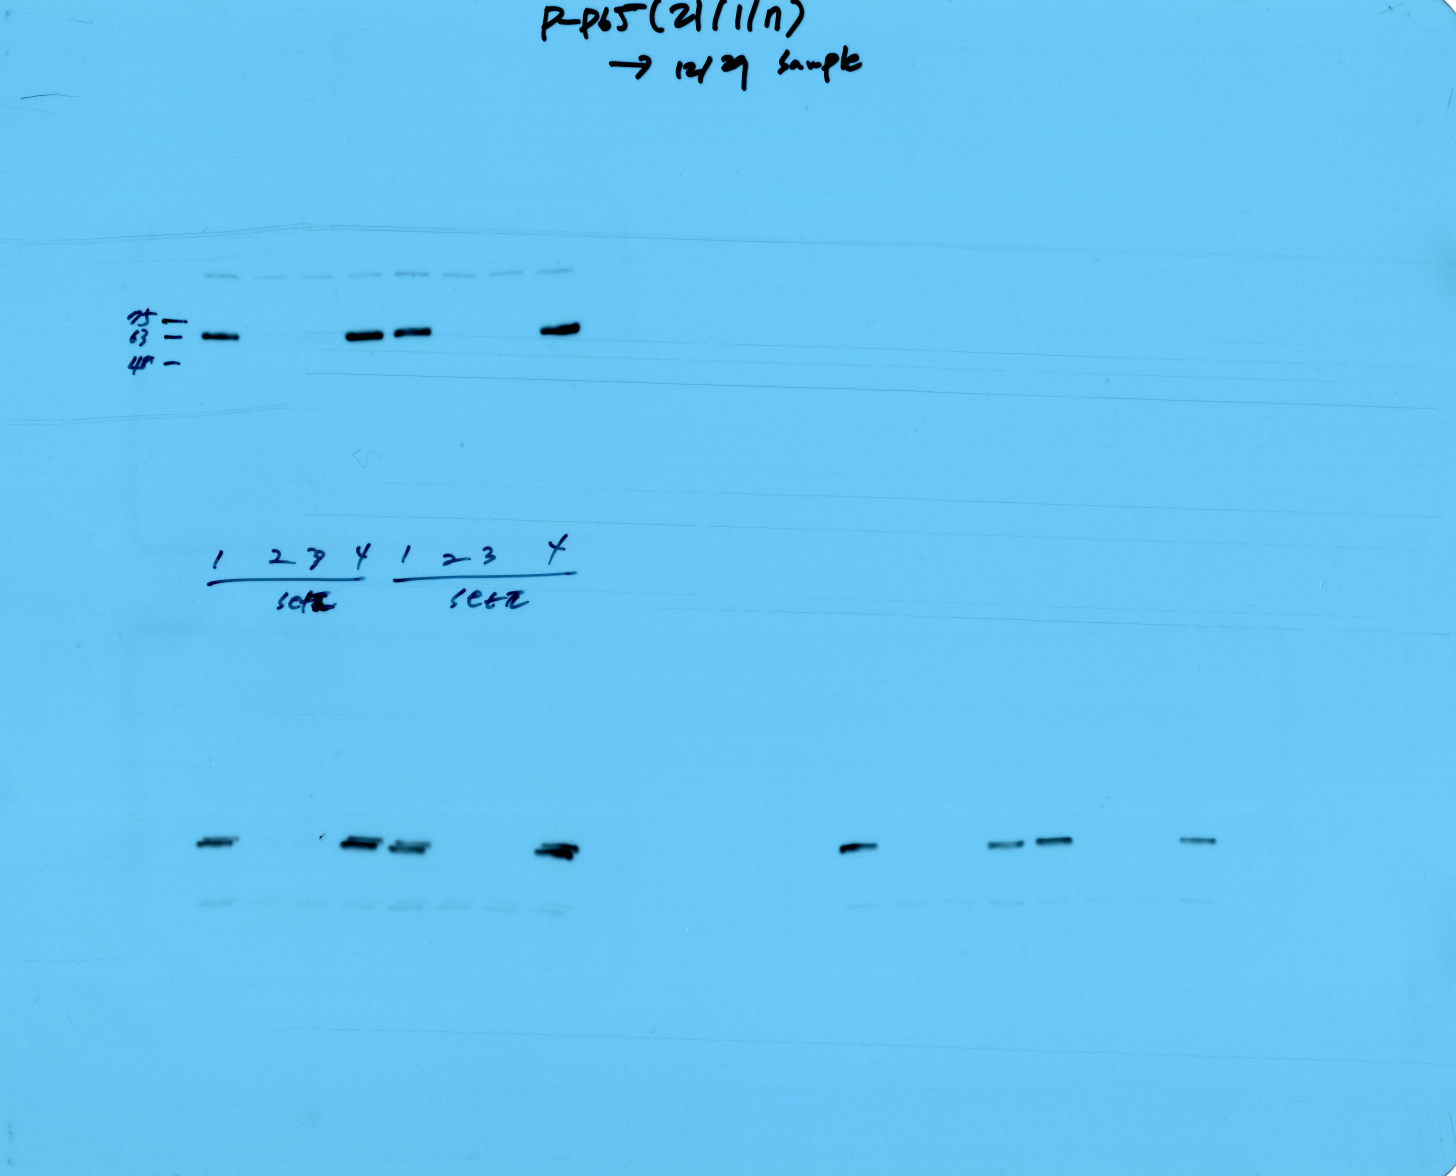
**

**Fig.4e, t-p65**

**
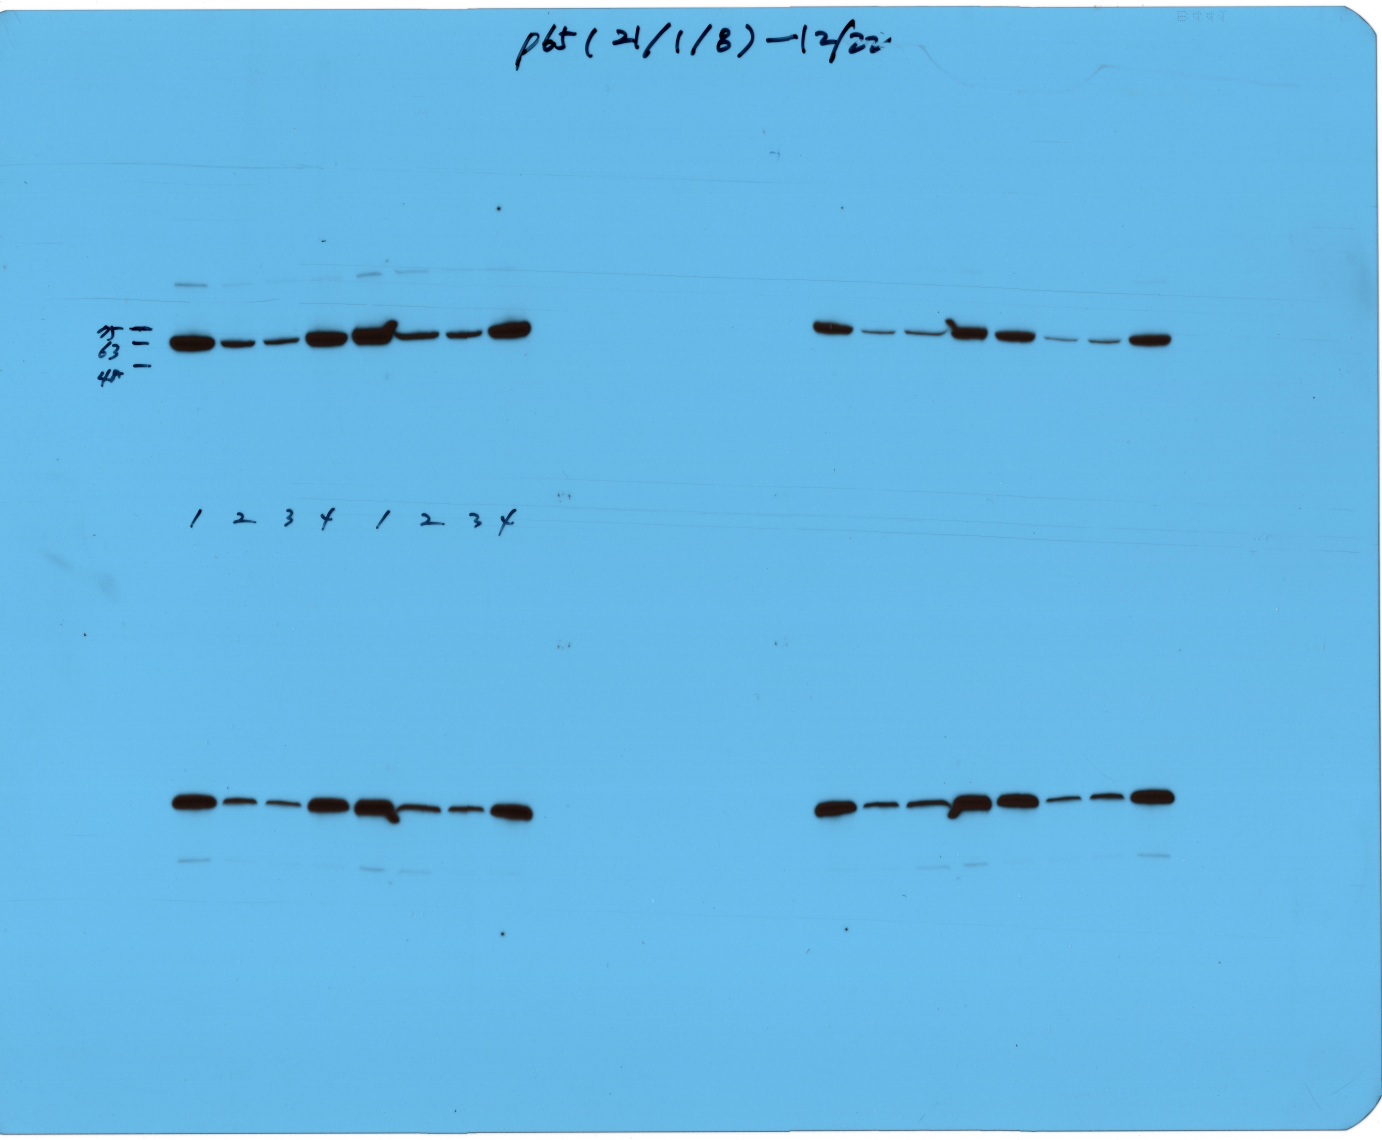
**

**Fig.4e, cIAP2**

**
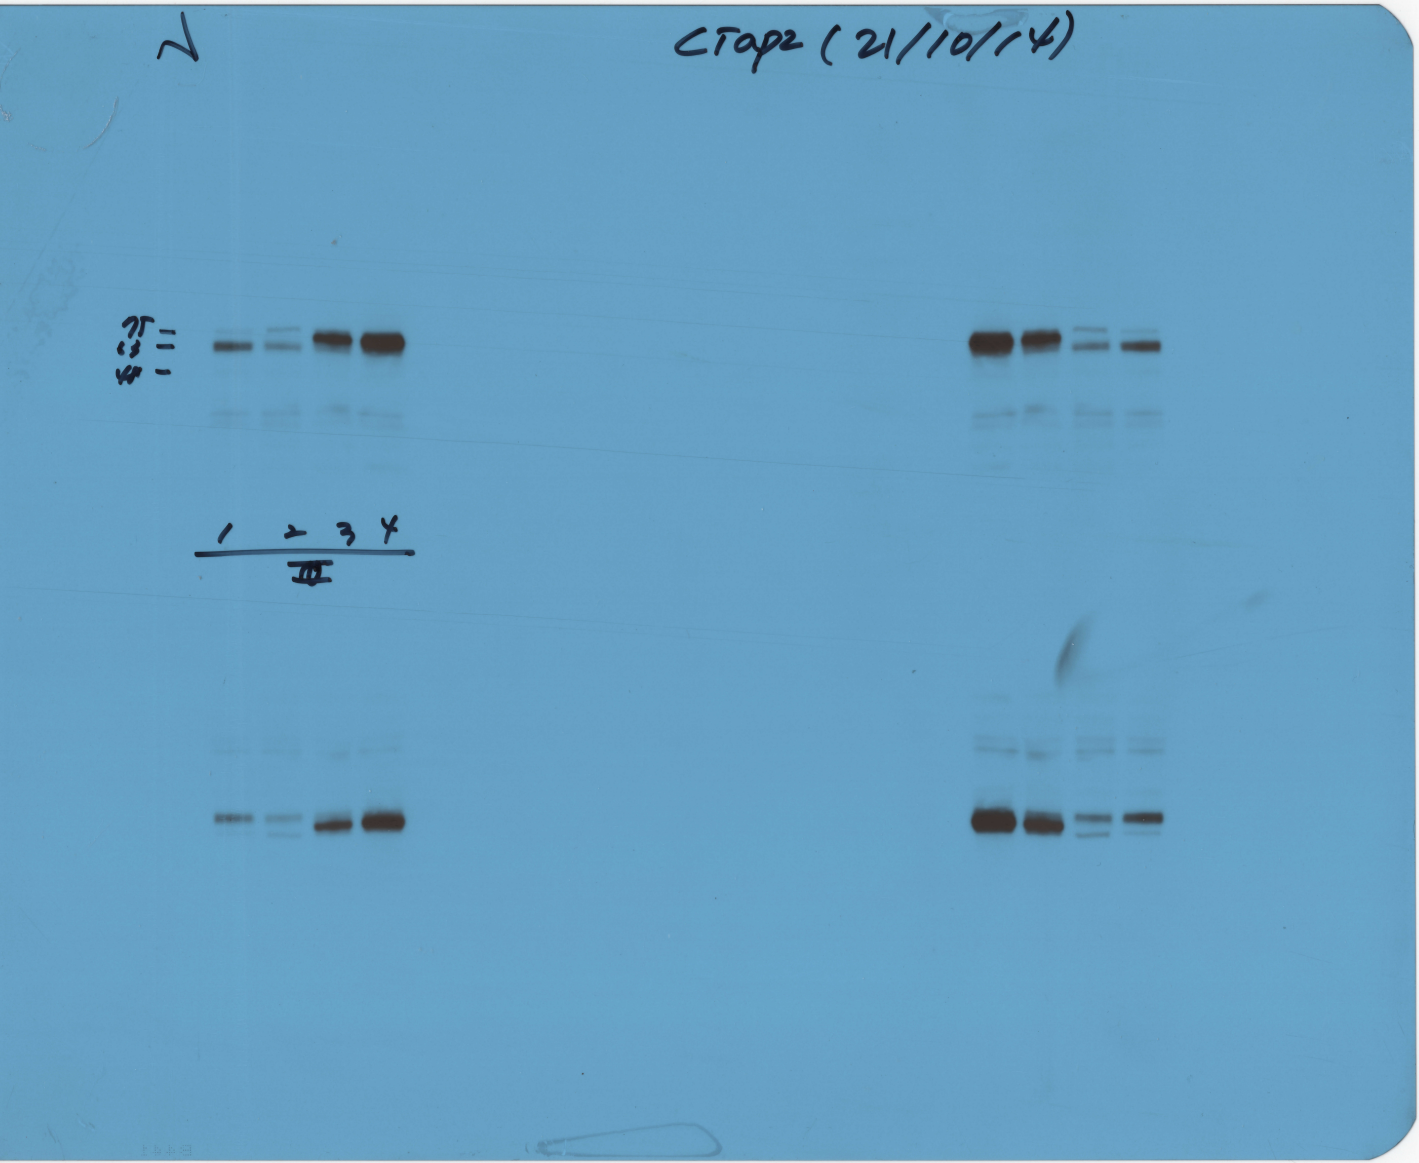
**

**Fig.4e, ɑ-tubulin**

**
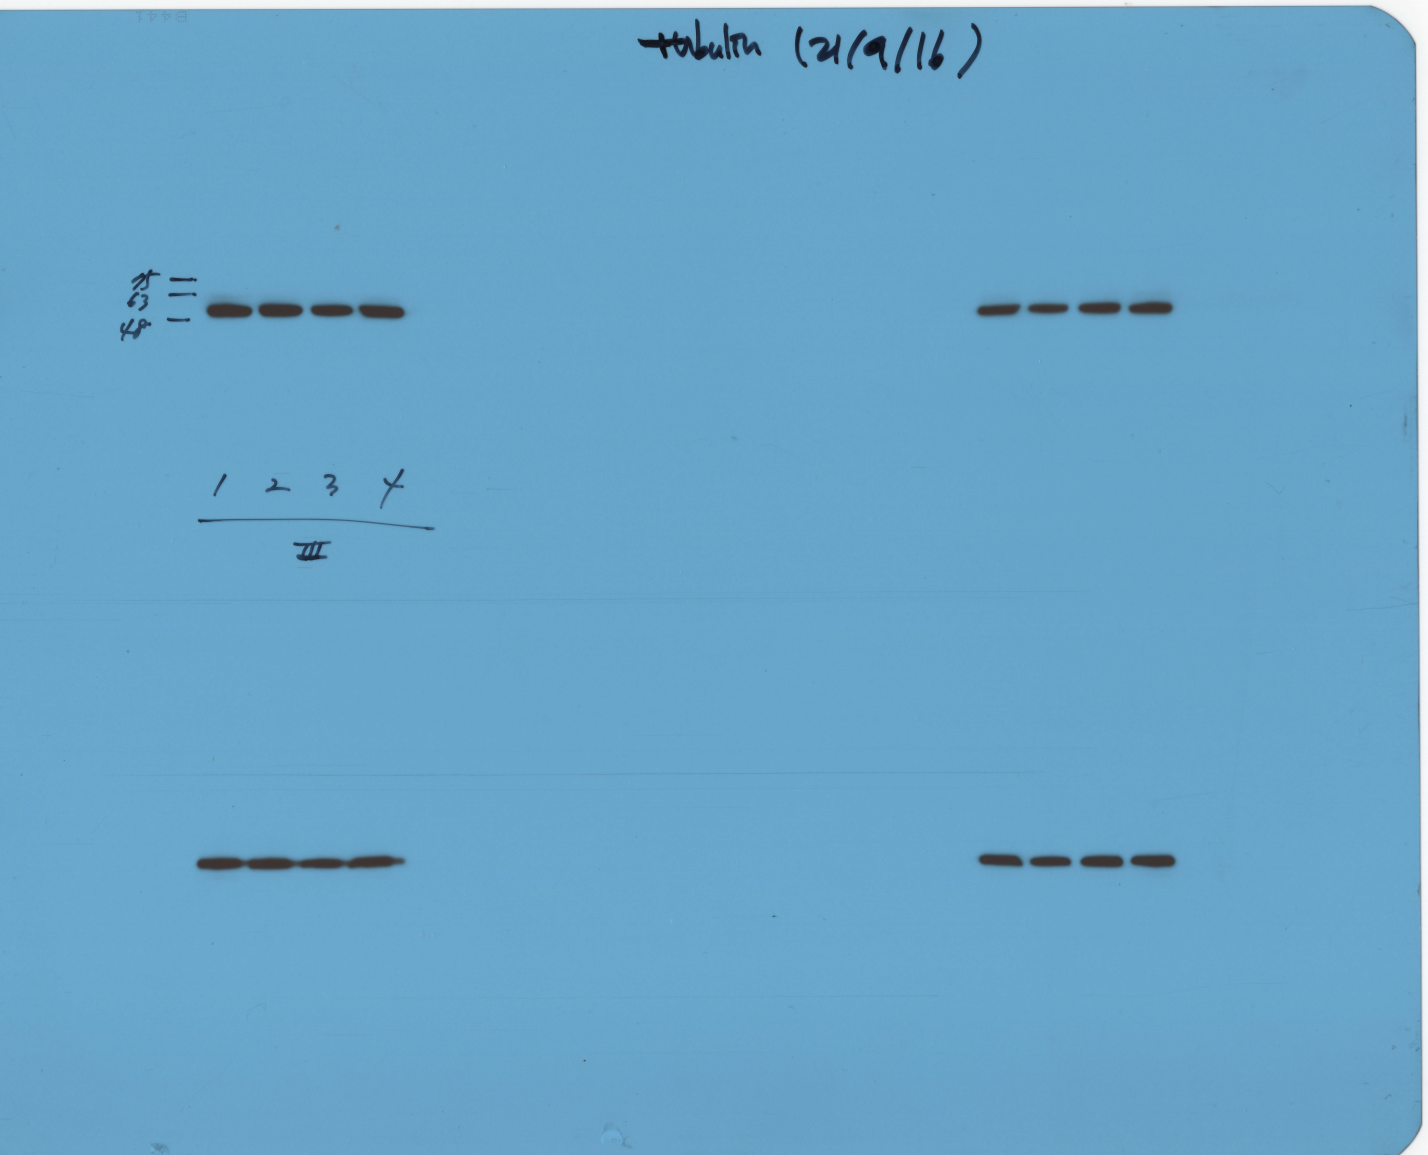
**
